# Supplementary material
Source: PubMed Central journal article supplement (PMC4332405)
Supplement: NIHMS636595-supplement-1.pdf [file NIHMS636595-supplement-1.pdf]

Figure S1

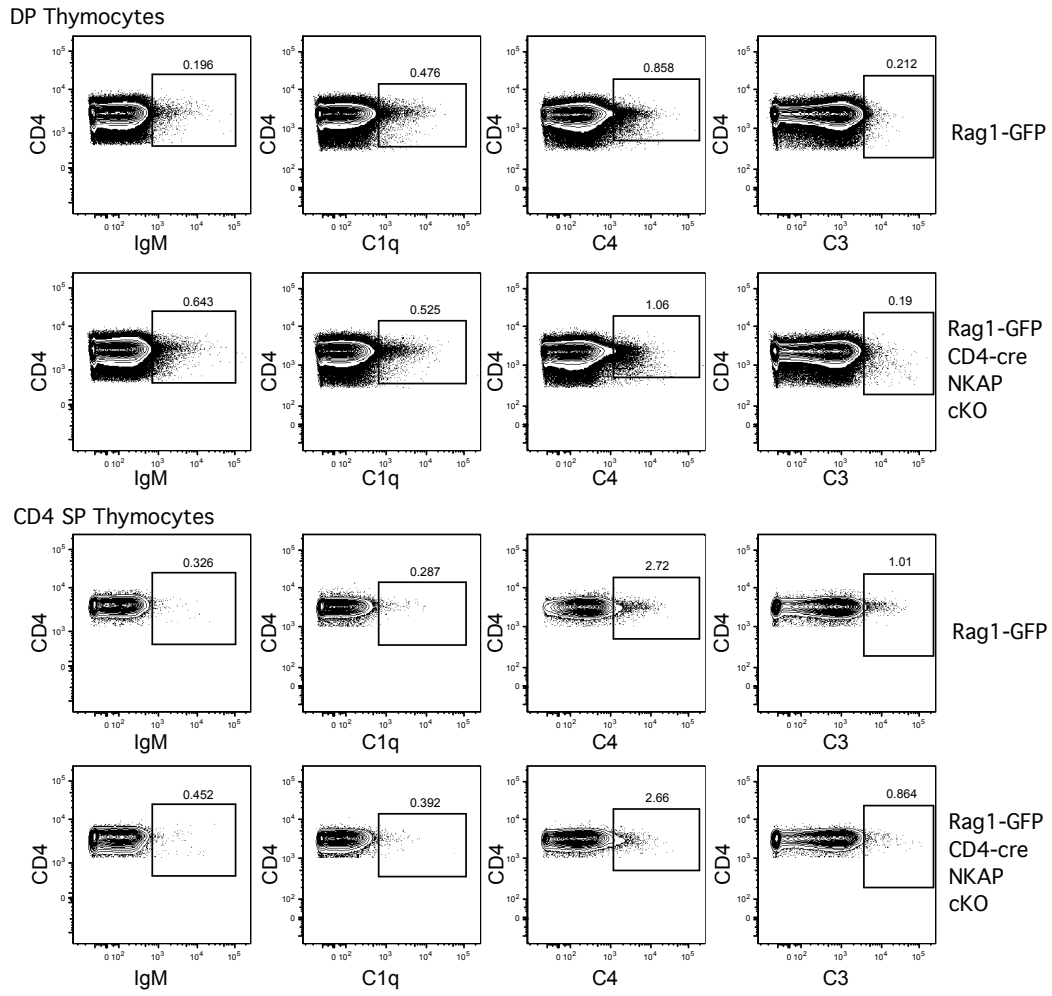

**Supplemental Figure 1:** Complement Deposition is not observed in CD4-cre NKAP cKO thymocytes. DP and CD4 SP thymocytes from WT and CD4-cre NKAP cKO mice were examined for deposition of C3, C1q, C4 and IgM (performed as described in Figures 2 and 3).
